# BKV clearance time correlates with exhaustion state and T-cell receptor repertoire shape of BKV-specific T-cells in renal transplant patients

Ulrik Stervbo<sup>1,2†</sup>, Mikalai Nienen<sup>1†</sup>, Benjamin JD Weist<sup>2</sup>, Leon Kuchenbecker<sup>2,3,4</sup>, Patrizia Wehler<sup>2</sup>, Timm H Westhoff<sup>1</sup>, Petra Reinke<sup>2</sup>, Nina Babel<sup>1,2\*</sup>

<sup>1</sup>Center for Translational Medicine, Medical Clinic I, Marien Hospital Herne, University Hospital of the Ruhr-University Bochum, Herne, Germany

<sup>2</sup>Berlin-Brandenburg Center for Regenerative Therapies, Charité – Universitätsmedizin, Berlin, Germany

<sup>3</sup>Department of Computer Science, Freie Universität, Berlin, Germany

<sup>4</sup>Max Planck Institute for Molecular Genetics, Berlin, Germany

## \* Correspondence:

Nina Babel

Nina.babel@charite.de

†These authors contributed equally to this work.

*Keywords: BKV, T-cell, TCR repertoire, exhaustion, diversity, immunology*

## Abstract

Reactivation of the BK polyomavirus is known to lead to severe complications in kidney transplant patients. The current treatment strategy relies on decreasing the immunosuppression to allow the immune system to clear the virus. Recently, we demonstrated a clear association between the resolution of BKV reactivation and reconstitution of BKV-specific CD4<sup>+</sup> T-cells. However, which factors determine the duration of viral infection clearance remains so far unclear. Here we apply a combination of in-depth multi-parametric flow cytometry and NGS-based CDR3 beta chain receptor repertoire analysis of BKV-specific T-cells to a cohort of 7 kidney transplant patients during the clinical course of BKV reactivation. This way we followed TCR repertoires at single clone levels and functional activity of BKV-specific T-cells during the resolution of BKV infection. The duration of BKV clearance did not depend on the number of peripheral blood BKV-specific T-cells nor on a few immunodominant BKV-specific T-cell clones. Rather, the T-cell receptor repertoire diversity and exhaustion status of BKV-specific T-cells affected the duration of viral clearance: high clonotype diversity and lack of PD1 and TIM3 exhaustion markers on BKV-specific T-cells was associated with short clearance time. Our data thus demonstrate how the diversity and the exhaustion state of the T-cells can determine the clinical course of BKV infection.

## 1 Introduction

Immunosuppression is one of the most important factors contributing to reactivation of the latent BK polyomavirus (BKV) (1). In fact, BKV reactivation can be observed in up to 80% of all kidney-transplant recipients (2). In as many as 10% of the cases, patients develop BKV-associated nephropathy (BKVAN)

36 which can lead to graft loss (2). Currently, there is no antiviral treatment for BK virus available and the  
37 recommended approach to management of BKVAN is a reduction or modification of immunosuppression, in  
38 order to achieve sufficient antiviral control by cellular immunity (1,3). In fact, we and others previously  
39 demonstrated a strong decrease of the BKV load upon reconstitution of BKV-specific T-cells in renal  
40 transplant patients (4,5). Very recently, we demonstrated an improved strategy for monitoring of BKV-specific  
41 T-cells by multi-parameter flow cytometry and provided in-depth characteristics of BKV-specific T-cells  
42 associated with the initiation of BKV load decline (6).

43 Although the essential role of BKV-specific T-cells for the initiation of BKV load decline has been well  
44 documented, it is so far not clear, which factors determine the clinical course of the disease. The time it takes  
45 to clear BKV differs between patients, and the clearance time after severe BKV infection (BKV load more  
46 than 100,000 copies/ml) can span weeks to even years (7,8). On the other hand, sustained BKV infection can  
47 cause immunopathogenesis and lead to irreversible renal graft tissue damage and graft failure (1). Therefore,  
48 understanding the factors that determine the clearance time once BKV load starts declining is crucial for  
49 understanding the pathogenesis of BKV-associated nephropathy and for improving therapeutic management in  
50 patients with BKV reactivation.

51 Besides the magnitude and functional activity of antigen-specific T-cells, the heterogeneity of clonal repertoire  
52 of antigen-specific T-cells has been suggested to play an important role in the immune defense. Pathogen  
53 recognition by T-cells is established through the T-cell receptor (TCR) specific for a cognate epitope in  
54 context of the HLA-molecule (9). T-cells with the same progenitor bear identical TCRs and constitute a T-cell  
55 clone. Recent studies suggest that diversity and size of the antigen-specific TCR repertoire are two critical  
56 determinants for the successful control of chronic infections and the decreased repertoire diversity correlates  
57 with the decline of immune responsiveness in ageing (10). Although a young adult human might harbor more  
58 than 100 million different TCRs (11), only a small fraction is specific for a given pathogen (12). Despite the  
59 low frequency, the identification and tracking of antigen specific TCRs are emerging as valuable tools in the  
60 analysis of organ rejection and control of persistent infections (13–15).

61 In the present work we provide a further characterization of BKV-specific T-cells using the combination of  
62 multi-parameter flow cytometry, cell sorting, and NGS-based clonotype profiling. By means of these  
63 comprehensive analyses in a small cohort of patients with different course and duration of BKV infection, we  
64 identified immunological factors that influence the length of the clearance time. We found a strong correlation  
65 between the BKV clearance time and TCR repertoire diversity as well as the expression of exhaustion markers  
66 on the surface of BKV-specific T-cells.

## 67 **2 Material and Methods**

### 68 **2.1 Study cohort**

69 This study was approved by our local ethical review committee in compliance with the declaration of Helsinki.  
70 Informed and written consent was obtained from all patients (Ethic Committee Charité University Medicine,  
71 Berlin, Germany, EA2/028/13). The study cohort consisted of 7 kidney transplant recipients with sustained  
72 BKV reactivation (Table 1). The HLA typing for each patient and donor is summarized in Figure 1.

### 73 **2.2 BKV viremia**

74 BKV-DNA copy numbers were determined in serum as previously described (16). Briefly, DNA was isolated  
75 from serum using a QIAamp DNA Mini Kit (Qiagen) according to the manufacturer's instructions. Primers  
76 and probes were designed to amplify the VP1 region of BKV. A plasmid standard containing the VP1 coding

77 region was used to determine the copy number per ml. Samples exceeding the detection level (>1000  
78 copies/ml) were considered positive.

### 79 **2.3 BKV stimulation**

80 PBMC were isolated from 40 ml freshly drawn heparin-treated peripheral blood using the Ficoll-Hypaque  
81 (PAA Laboratories) gradient method and collected in RPMI-1640 medium (supplemented with L-glutamine (2  
82 mmol/l), fetal calf serum (10%), penicillin (100 IU/ml), and streptomycin (0.1 mg/ml), all from Biochrom) and  
83 stimulated with overlapping peptides of all viral products as previously described (17). Briefly, an overlapping  
84 peptide pool was created from individual 15mer BKV peptides with an 11 amino acids overlap of the BKV  
85 proteins VP1 (Swiss-Prot ID : P14996), VP2 (Swiss-Prot ID : P03094), VP3 (P Swiss-Prot ID : 03094-2),  
86 small T antigen (Swiss-Prot ID : P03082) and large T antigen (Swiss-Prot ID : P14999). Although VP3 and  
87 small T antigen are included in the ORF of VP2 and large T antigen, respectively, both peptides are included  
88 in the overlapping peptide pool to address the shift in the starting position and to mimic the relative abundance  
89 of the epitopes. The scheme of the 15mer 11 overlapping peptide pools is illustrated in Figure S1 in  
90 Supplementary Material.

91 All individual peptide pools (JPT) were reconstituted in DMSO and phosphate-buffered saline (PBS) to 1.5  
92 mM (2.5µg/µl) for each peptide.  $0.5-1 \times 10^7$  PBMCs were incubated with the BKV overlapping peptide pool  
93 at final concentration of 1 µg peptide/ml for 16 h at 37 °C, 5% CO<sub>2</sub>. Brefeldin A (Sigma-Aldrich) was added  
94 at 1 µg/ml after 2 hours.

### 95 **2.4 Antibodies and staining procedure**

96 Cells were stained with anti-CD3-eF650 (Clone: UCHT1; eBioscience), anti-CD4-PerCP/Cy5.5 (Clone: SK3;  
97 BD Bioscience), anti-CD8-BV570 (Clone: 3B5; Invitrogen), and Live/Dead NearIR (Invitrogen). The surface  
98 staining was performed in PBS for 15 minutes at room temperature in the dark and subsequently fixed using  
99 Permeabilizing Solution 2 (BD Biosciences) for 10 minutes at room temperature.

100 Intracellular staining was performed with anti-CD137-PE/Cy5 (Clone: 4B4-1; BD Biosciences), anti-CD154-  
101 APC/Cy7 (Clone: 24-31; Biolegend), anti-PD1-BV710 (Clone: EH12.2H7; Biolegend), and anti-TIM3-APC  
102 (Clone: F38-2E2; eBioscience) for 30 minutes at room temperature in the dark.

103 Samples were acquired on a LSRII-Fortessa (BD Biosciences) and at least  $1.5 \times 10^6$  events were recorded.  
104 Calibration of the instrument was reconfirmed weekly with rainbow beads (BD Biosciences).

### 105 **2.5 TCR repertoire analysis**

106 T-cells were sorted by flow cytometry according to CD4 and CD8 expression from unstimulated PBMCs  
107 stained with anti-CD3-eF650 (Clone: UCHT1; eBioscience), anti-CD4-PerCP/Cy5.5 (Clone: SK3; BD  
108 Bioscience), anti-CD8-BV570 (Clone: 3B5; Invitrogen), and Live/Dead NearIR (Invitrogen) at the BCRT  
109 Flow Cytometry Laboratory. For isolation of BKV-specific T-cells, PBMCs were stimulated with the BKV  
110 overlapping peptide pool at final concentration of 1 µg peptide/ml for 16 h at 37 °C, 5% CO<sub>2</sub> in the presence  
111 of 1µg/ml CD40 (Miltenyi Biotec). Activated BKV-specific T-cells were MACS isolated using the IFN $\gamma$   
112 Secretion Assay – Cell Enrichment and Detection Kit, human (Miltenyi Biotec), per manufacturer's  
113 instructions. Genomic DNA was isolated using the AllPrep DNA/RNA Micro Kit (Qiagen).

114 The recombined V-CDR3-J region of the recombined genomic TCR- $\beta$  locus was amplified with partly  
115 degenerate primers covering all functional V $\beta$  and J $\beta$  regions (0.25 µM each) as previously described (18).  
116 Using Phusion Hot Start II DNA Polymerase (Thermo Fisher) and DNA template (up to 1 µg) in a final  
117 volume of up to 100 µl, the PCR reaction was heated to 98°C for 5 minutes and followed by typically 20

118 cycles of 98°C 15s, 65°C 30s and 72°C 30s, with final extension at 72°C for 5 min. The PCR product was  
119 purified with Sera-Mag SpeedBead Carboxylate-Modified Magnetic Particles (GE Healthcare Life Sciences)  
120 and after wash with 70% EtOH resuspended in nuclease-free water (Thermo Fisher). Purified PCR product was  
121 used in a second PCR where sample indices were added as above, with only 14 cycles of PCR. Indexed PCR  
122 product was separated on 2%-LMP agarose (Sigma) and purified with the Gel Extraction Kit (Qiagen).

123 Sequencing library preparation with consequent sequencing was performed using Illumina MiSeq Technology  
124 at the Next Generation Sequencing Core Unit at Berlin Brandenburg Center for Regenerative Therapies,  
125 Berlin, Germany. Reads with an average quality score below 30 were excluded from further analysis. The  
126 remaining high quality reads were processed using IMSEQ to identify the CDR3 amino acid sequence (19).  
127 CDR3 embedded at wrong reading frames and with stop codons were discarded. On average we obtained  
128 488,700 reads per sample, with first and third quantile of 279,400 and 626,400, respectively. Antigen specific  
129 clonotypes of the unstimulated whole-blood samples were identified by overlap to clonotypes obtained by the  
130 IFN $\gamma$  Secretion Assay.

## 131 **2.6 Diversity estimation**

132 To account for differences in sequence depth, the clonotypes were rarified to equal sample size before  
133 estimation of repertoire diversity. Rarefaction was performed using the R-package vegan, version 2.4-3 (20).  
134 The Shannon index (21) is given by

$$D_S = - \sum_{i=1}^n p_i \ln(p_i)$$

135 where  $p_i$  is the proportion of the  $i$ th clonotype in the population.

136 The Berger-Parker index (22) is given by

$$D_{BP} = \frac{N_A}{N_T}$$

137 where  $N_A$  indicates the abundance of the most abundant clonotype,  $N_T$  is the total number of clonotypes. This  
138 index relies on the most abundant clonotype and is therefore less sensitive to sequencing errors.

## 139 **2.7 Estimation of clearance time**

140 Patients were considered free from BKV viremia if at least two consecutive measurements were below  
141 detection limit. The time from the highest viral load until complete virus clearance was estimated from the  
142 slope of the linear fit of the log-transformed measurements spanning from the highest BKV copy number to  
143 the first BKV viremia free measurement. The initial conditions for the clearance time estimation were the  
144 highest measured viremia level:

$$t_{remission} = \frac{BKV_{max} - BKV_{min}}{slope}$$

145 where  $BKV_{min}$  is the detection limit of 1000 BKV copies/ml.

## 146 **2.8 Statistical analysis**

147 Flow cytometry data was analyzed using FlowJo version 10.3 (Tree Star). Statistical analysis was performed  
148 using R, version 3.3.1 (23). p values < 0.05 were considered significant.

## 149 **3 Results**

### 150 **3.1 BKV viremia clearance time differs between kidney transplant recipients**

151 BKV viremia was monitored in kidney transplant patients with BKV reactivation (Figure 2). The highest  
152 measured BKV copy number followed by load decline was taken as the start of the viremia clearance phase.  
153 The patient was considered free from BKV viremia when samples from at least two consecutive time points  
154 were both negative. The first of these time points marked the end of the viremia clearance phase. The actual  
155 clearance is at a point before the observed clearance. To limit the effect of sampling frequency, we sought to  
156 obtain a data driven length of the viremia clearance phase by linear regression on log-transformed BKV viral  
157 load. The slope of the fitted curve was used the slope to estimate the number of days until the virus was  
158 cleared. The linear fit explained 78 to 96% of the variation in the viremia decline phase (Figure 2A). The  
159 estimated clearance time ranged between 46 and 298 days (Figure 2B). The time with increasing BKV  
160 viremia was similarly estimated through linear regression (Figure 2C). No association between the length of  
161 the inclining and declining phase was found (data not shown).

### 162 **3.2 Magnitude and phenotypic characteristics of BKV-specific T-cells do not explain 163 differences in BKV clearance time**

164 Previously, we showed that the BK viral load decline was associated with the reconstitution of helper and  
165 cytolytic BKV-specific T-cells in peripheral blood (6). However, the factors that affect the BKV infection  
166 clearance time were so far not addressed. Here, we analyzed the effect of functional and phenotypic  
167 characteristics on the duration of BKV clearance (Figure 3A, Figure S2-S8 in Supplementary Material). First,  
168 using the previously published gating strategy and activation markers CD137/CD154 for CD4<sup>+</sup> T-cells and  
169 CD137/Granzyme B for CD8<sup>+</sup> T-cells (6), the frequencies of BKV-specific CD4<sup>+</sup> and CD8<sup>+</sup> T-cells circulating  
170 in peripheral blood were evaluated. No correlation between the duration of BKV clearance time and the ratio  
171 of either BKV-specific CD4<sup>+</sup> or CD8<sup>+</sup> T-cells at the peak of viral load could be observed (Figure 3B and C).  
172 The frequencies of total CD4<sup>+</sup> or CD8<sup>+</sup> also did not correlate with the clearance time (Figure S9A and B in  
173 Supplementary Material).

174 Since previous data demonstrated a better antiviral control in patients with elevated number of multi-  
175 functional cells (17), we next addressed the question whether functionality of BKV-specific T-cells could  
176 explain the difference in clearance time. To this end we analyzed multi-functional characteristics of BKV-  
177 specific T-cells as defined by multiple cytokine production (IL2, TNF $\alpha$  and IFN $\gamma$ ) and/or effector molecule  
178 Granzyme B. The analysis of BKV-specific cytokine multifunctional and effector molecule producing  
179 capacities did not reveal any influence on duration of clearance period (Figure S9C and D in Supplementary  
180 Material).

### 181 **3.3 Tracking of BKV-specific TCRs**

182 Previous studies on the protective function of cellular immunity in cancer suggest an important role of the  
183 TCR repertoire (24,25). However, in case of viral infections it is not clear, whether few immunodominant  
184 clones or rather diverse, polyclonal TCR repertoires determine the clinical course infection (26,27).  
185 Addressing this question, we analyzed BKV-specific T-cells on a single clone level during BKV clearance.

186 We have previously used NGS-based clonotype profiling to identify BKV-specific T-cell clones and track  
187 them in peripheral blood, renal tissue biopsy, and urine (18). Using a similar approach, we were able to study  
188 the kinetics of BKV-specific T-cells on the clonal level of whole blood-derived CD4<sup>+</sup> and CD8<sup>+</sup> T-cell subsets  
189 in the current study (Figure 4). Antigen specific clonotypes within whole-blood samples were identified by

190 identity to BKV-specific clonotype sequences obtained by the IFN $\gamma$  Secretion Assay. The distribution of  
191 length TCR $\beta$  CDR3 of these BKV-specific clonotypes had a similar shape for all patients and was normally  
192 distributed in all cases (Figure S10 in Supplementary Material). A tendency for slightly longer CDR3 was  
193 observed for patient 3 (17 AA on average compared to 15 AA for the others; Table S1 in Supplementary  
194 Material). However, the most abundant length for the patients was 15 AA.

195 The TCR $\beta$  V-segment V6 dominated the BKV-specific clonotypes in all patients. The segment V7 was also  
196 dominant in the patients 1 and 7 (Figure S11A in Supplementary Material). The J-segment J2-1 was found to  
197 be frequent in all patients, but also J1-1 and for patient 5 the J1-6 were also present (Figure S11B in  
198 Supplementary Material). When comparing the V-J-segment usage, combinations of the most dominant V-  
199 and J-segments for each patient were frequently found, but otherwise no particular pattern was visible (Figure  
200 S11C in Supplementary Material).

201 In our study we identified BKV-specific T-cell clonotypes and followed them in peripheral blood of renal  
202 transplant patients at the time point of initiation of viral decline and after the resolution of BKV infection.  
203 While tracking BKV-specific clonotypes during the course of viral decline we observed substantial changes in  
204 TCR repertoires. While only 0.9% (range: 0 – 22.0%) of clonotypes remained stable during the clinical course  
205 of BKV clearance, 28.4% (range: 0.4 – 87.5%) of clonotypes showed expansion and 64.2% (range: 4.9 –  
206 98.8%) of clonotypes showed loss in their frequencies (Figure 4A). We also analyzed changes in TCR  
207 repertoire between mid-time of viral decline and after BKV clearance (Figure 4B). Similarly strong repertoire  
208 changes were observed in most patients in the course of viral load decline (mid-time – resolution). With  
209 respect to the role of repertoire turn-over for the viral clearance, no specific patterns could be clearly detected.  
210 However, in patient with severe long-lasting BKV replication (patient 7), we observed a high number of stably  
211 detectable clonotypes (40 % of BKV-specific clones). This case was especially pronounced between mid-time  
212 and viral clearance as compared to other patients (Figure 4B).

### 213 **3.4 Low diversity of BKV-specific clonotypes indicates prolonged clearance time**

214 We next asked how the TCR repertoire diversity of BKV-specific T-cells reflected the differences in clearance  
215 time. We first evaluated the commonly used Shannon index, but found no pattern associating with the  
216 clearance time (Figure 5A). Berger-Parker is another diversity index, which disregards the clonotypes with  
217 very low frequency (that is the tail of the distribution), and can therefore be considered a more robust index  
218 (28). When we looked at inverse of the Berger-Parker index – which directly reflects the clonal diversity of an  
219 analyzed population – we found a strong correlation to the clearance time (Figure 5B, Figure S12D in  
220 Supplementary Material; Pearson correlation: -0.99, p-value: 0.013).

221 We also assessed the clonal size of the TCR repertoire and cumulative frequencies of BKV-specific TCR by  
222 analyses of most abundant BKV-specific T-cell clones (Figure S12E in Supplementary Material). Clonal size  
223 data were in line with the data on repertoire diversity. Thus, in cases of low diversity, cumulative frequencies  
224 of the most abundant clonotypes were much higher and accounted for a lower diversity than in cases where  
225 cumulative frequencies of most abundant clonotypes were low. In detail, the lowest repertoire diversity  
226 corresponded to 25.1 % as a cumulative frequency of 10 most abundant clones, whereas the highest repertoire  
227 diversity corresponded to a cumulative frequency of 2.0% for the 10 most abundant clones. Accordingly to the  
228 diversity index analyses, low cumulative levels correlated with short clearance time (Pearson: 0.99, p-value:  
229 0.01). The observed correlations were not due to general differences in complete CD4<sup>+</sup> T-cell repertoire  
230 (Figure S12A-C in Supplementary Material).

### 231 **3.5 Activation can counteract low diversity**

232 Patient 3 clearly rejected the observed pattern. This particular patient showed a fast BKV load decline but a  
233 very low level of BKV-specific TCR repertoire diversity (Figure 5B). We therefore asked whether the  
234 expansion of few BKV-specific clones could explain this aberrant behavior. We reasoned that any expansion  
235 *in vivo* would be reflected in expanded levels of antigen specific T-cells and performed, consequently, in-  
236 depth characterization of BKV-specific T-cell immunity in this patient by flow cytometry. Of interest, we  
237 detected very high frequencies of BKV-specific CD4<sup>+</sup> and CD8<sup>+</sup> T-cells in peripheral blood of patient 3; the  
238 magnitude of the T-cell response was almost 10 times higher compared to the frequencies among the other  
239 patients (Figure 5C).

### 240 **3.6 Prolonged clearance time correlates with expression of exhaustion markers**

241 In addition to the demonstrated correlation between repertoire diversity and clearance time, we also evaluated  
242 the role of functional exhaustion of BKV-specific T-cells. Flow cytometric analysis of the exhaustion markers  
243 PD1 and TIM3 on CD4<sup>+</sup> T-cells demonstrated a very strong correlation between the expression of these  
244 markers on BKV-specific CD4<sup>+</sup> T-cells and the clearance time (Figure 5D). Interestingly no association to co-  
245 expression of PD1 and TIM3 was observed (Figure S13C in Supplementary Material). No expression of  
246 either exhaustion marker was seen among BKV-specific CD8<sup>+</sup> T-cells (Figure S13A and B in Supplementary  
247 Material). Our data thus show that exhaustion of the CD4<sup>+</sup> T-cells is associated with extended clearance time.

## 248 **4 Discussion**

249 The present study provides characterization of BKV-specific T-cells in a small cohort of renal transplant  
250 recipients. In line with previous reports (7,8), we observed significant differences in clearance time of BKV  
251 virus. We used modern high throughput technologies such as next generation sequencing and multi-parameter  
252 flow cytometric analysis to address the question how the fitness of the immune system affects the BKV  
253 clearance time. Here, we presented evidence that the diversity of the BKV-specific TCR repertoire inversely  
254 correlates with the duration of BKV clearance from initiation of the load decline until virus clearance. In  
255 addition, we showed that the expression of exhaustion markers PD1 and TIM3 on BKV-specific CD4<sup>+</sup> T-cells  
256 at the time point of initial BKV load decline correlates with sustained BKV reactivation, while lack of the PD1  
257 and TIM3 expression corresponded to shorter clearance time. These data therefore suggest that the repertoire  
258 diversity and functional fitness of BKV-specific T-cells as defined by the expression of exhaustion markers  
259 are key players in determining the clinical course of viral infection and clearance.

260 The essential role of T-cells in controlling BKV reactivation and clearance is well established. We have  
261 previously shown that the loss of BKV-specific T-cells is associated with a higher risk of BK viremia (29) and  
262 that an increase in BKV-specific T-cell response corresponded to the clearance of BKV reactivation (4). The  
263 current recommendation for the management of BKV infection in renal transplant patients includes  
264 accordingly a reduction or modification of immunosuppressive therapy allowing for an immune system  
265 reconstitution. In fact, frequencies of BKV-specific T-cells increase upon reduction of immunosuppression as  
266 demonstrated previously (5,30). However, despite similar therapeutic approaches, the duration of BKV  
267 clearance varies among patients spanning period of time from several weeks to even years (7,8). Factors that  
268 might be responsible for the different clinical course of BKV infection are not identified so far. Addressing the  
269 role of the magnitude of BKV-specific T-cell immunity we analyzed the frequencies of BKV-specific T-cells  
270 in a small patient cohort. No correlation was found between the duration of viral clearance and the frequencies  
271 of BKV-specific T-cells. We also analyzed the role of the functional characteristics of BKV-specific T-cells  
272 on the clinical course of infection. Previous studies demonstrated an important role of multi-functional T-cells

273 for the control of chronic infections (31–33). Our own data in patients with a history of resolved low-level  
274 BKV infection demonstrated a higher number of multi-functional CD4<sup>+</sup> T-cells compared to patients with a  
275 history of severe long-lasting BKV infection (17). Our present finding that the frequencies of BKV-specific  
276 multi-functional T-cells at the peak of viral load did not associate with a shorter clearance time, indicate the  
277 importance of other factors once the viral control is broken.

278 Assessment of T-cell receptor repertoires and T-cell clonality is the focus of many immunological studies  
279 providing in-depth T-cell characterization (24,34–36). This technology provides a unique potential for the  
280 analysis of memory T-cells in humans, e.g. clonal relations between circulating and resident cells or various  
281 functional subsets (34,37); assessment of T-cell repertoire size and diversity(10); detection and tracking of  
282 antigen-specific T-cells within various tissue samples (14,18). In some clinical situations, TCR repertoire  
283 profiling is the only available method to differentiate between an undesired pathological T-cell response and a  
284 local protective antiviral immune response, i.e. the case of acute transplant rejection by alloreactive T-cells  
285 versus BKV clearance by virus-specific T-cells infiltrating the kidney transplant (18,38). Questions regarding  
286 the role of clonotype diversity and protective capacity of the adaptive cellular immune response remain so far  
287 not completely resolved. Some studies suggest that diversity and size of the antigen-specific TCR repertoire  
288 are two critical determinants for successful control of chronic infections and that the decreased repertoire  
289 diversity in age correlates with the decline of immune responsiveness in ageing (10).

290 Although it is generally believed that a large T-cell clonotype diversity provides the optimal protection  
291 (27,39), mice with reduced TCR diversity are capable of controlling LCMV or Sendai virus infections (40)  
292 and differences in diversity of influenza-specific CD8<sup>+</sup> T-cells were not reflected in differences in overall  
293 functionality (41). On the other hand, an association between TCR $\beta$  chain high diversity and low incidence of  
294 CMV and EBV reactivations has been observed in solid organ or hematopoietic stem cell transplant patients  
295 such that higher diversity yields lower incidence (42–44).

296 In line with these data, we here demonstrated a negative correlation between diversity level and clearance time  
297 of BKV infection. However, a single patient defied the observed association. We believe that the low diversity  
298 level was substituted by a high level of functional fitness of BKV-specific T-cells. In fact, we observed a  
299 nearly 10 times higher frequency of BKV-specific T-cells in the analyzed as compared to the other patients  
300 and very low levels of PD1 or TIM3 expression on BKV-specific CD4<sup>+</sup> T-cells at the peak of BKV viral load.  
301 The large frequency and low diversity was reflected in a strong dominance of the first ten most abundant  
302 BKV-specific clonotypes which indicates an expansion of particular T-cell clones. The relationship between  
303 the strength of the TCR signal and the proliferation of the T-cell is well established (45). It is therefore  
304 possible that highly specific T-cell clones dominate in this one patient, resulting in low diversity of the overall  
305 BKV-specific repertoire. In a more general sense, it might be that most BKV-specific TCRs are of lower  
306 avidity and that high avidity TCRs are rare and generated by chance. This also explains the observation, where  
307 low diversity leads to longer clearance times: a broader TCR repertoire is better equipped to generate a  
308 population of BKV-specific T-cells required to initiate and maintain the clearance of the virus (4,5). We are  
309 currently in the process of elucidating the avidity of a select number of the identified BKV specific clonotypes.

310 An alternative explanation to the low diversity but fast clearance of patient 3 could be that the patient has a  
311 particular set of HLA molecules, which allow strong presentation of immunogenic BKV epitopes. However,  
312 the haplotypes of patient 3 were the same as for patient 4; at least on the level of allele group. This indicates  
313 that the HLA haplotype alone is insufficient to explain the TCR diversity.

314 The expression of the exhaustion markers PD1 and TIM3 on the CD4<sup>+</sup> T-cells displayed in both cases a  
315 straight forward relationship with the clearance time, such that the absence of exhaustion markers was



316 associated with shorter clearance time. This makes it possible, that the fitness of the T-cells is a major player  
317 in creating a pool of BKV controlling T-cells in addition to the repertoire diversity. Since both the repertoire  
318 diversity and the expression of exhaustion markers correlated with the clearance rate, it is possible that one  
319 effect depends on another one: low diversity leads to insufficient clearance and therefore to long-lasting BKV  
320 reactivation with a subsequent sustained activation of BKV-specific T-cells. This long-lasting T-cell activation  
321 could result in a high-level of exhaustion. Alternatively, the expression of exhaustion makers leading to a  
322 functional impairment of T-cells might lead to a protracted viral elimination and contribute therefore to a  
323 permanent activation of BKV. Such permanent antigenic stimuli can lead to clonal skewing with an expansion  
324 of a few clones, similar to a phenomenon described for older patients with CMV reactivations (46). Although  
325 our study provided first observations between T-cell functionality, duration of viral clearance, and T-cell  
326 clonality (Figure 6); the interplay between the T-cell exhaustion status and the TCR repertoire diversity is of  
327 special interest and will be addressed in ongoing studies.

328 Our study is limited in that it is based on a small cohort of 7 kidney transplant patients, with TCR $\beta$  CDR3 data  
329 available for only 5 of these 7 patients. This is arguably a very small cohort. However, the observed  
330 associations had high correlation coefficients indicating small variance in the data, and thus demonstrating that  
331 the findings presented here are robust, despite the small cohort. The associated p-values were likewise small,  
332 confirming that the observations might not be per chance only. The viral load can fluctuate by up to one log,  
333 but we generally observed a steady decline in BKV copies/ml after some maximal value. We therefore defined  
334 the start of the clearance phase as the peak in BKV viremia. Other definitions might be valid, but they would  
335 affect the clearance duration for all patients equally, and thereby not disturb the order of clearance times.

336 Though the results presented in our study are very encouraging, the small cohort size warrants caution. The  
337 second limitation is the sampling schedule. Since the course of the viral reactivation is inherently  
338 unpredictable, the acquisition of samples at the very early stage/and or peak of reactivation is very much a  
339 case of “hit and miss”. Future studies on a large patient cohort addressing the role of TCR diversity and T cell  
340 exhaustion in general are required to validate our findings. To include the most relevant periods of BKV  
341 reactivation and make such monitoring schedule logistically feasible, blood should be collected and stored as  
342 isolated and frozen PBMCs at regular intervals. In summary, we propose that the exhaustion status of CD4<sup>+</sup> T-  
343 cells affects the diversity of the antigen specific TCR repertoire resulting in prolonged clearance time after  
344 BKV reactivation (Figure 6). It will be interesting to see if this is a particular feature of the control of BKV in  
345 a transplantation setting, or if this is general to chronic infections.

## 346 **5 Conflict of Interest**

347 The authors declare that the research was conducted in the absence of any commercial or financial  
348 relationships that could be construed as a potential conflict of interest.

## 349 **6 Author Contributions**

350 US, analyzed the data, created the figures and drafted the manuscript; MN performed the experiments and  
351 analyzed the data; BW and WP performed the experiments; LK analyzed the data; TW, PR, and NB designed  
352 the study; all authors revised the manuscript and approved its final version.

## 353 **7 Funding**

354 This work was supported by BMBF grant e:KID.

## 355 **8 Acknowledgments**

356 We would like to acknowledge the excellent assistance of the BCRT Flow Cytometry Laboratory and of the  
357 BCRT Next Generation Sequencing Core Unit. We acknowledge support from the Federal Ministry of  
358 Education and Research (BMBF) and the Open Access Publication Fund of Charité – Universitätsmedizin  
359 Berlin.

## 360 **9 Data Availability Statement**

361 The raw data supporting the conclusions of this manuscript will be made available by the authors, without  
362 undue reservation, to any qualified researcher.

## 363 **10 References**

- 364 1. Babel N, Volk H-D, Reinke P. BK polyomavirus infection and nephropathy: the virus-immune system  
365 interplay. *Nat Rev Nephrol* (2011) **7**:399–406. doi:10.1038/nrneph.2011.59
- 366 2. Siguier M, Sellier P, Bergmann J-F. BK-virus infections: a literature review. *Med Mal Infect* (2012)  
367 **42**:181–187. doi:10.1016/j.medmal.2012.04.011
- 368 3. Pinto M, Dobson S. BK and JC virus: A review. *J Infect* (2014) **68 Suppl 1**:S2-8.  
369 doi:10.1016/j.jinf.2013.09.009
- 370 4. Schachtner T, Müller K, Stein M, Diezemann C, Sefrin A, Babel N, Reinke P. BK virus-specific  
371 immunity kinetics: a predictor of recovery from polyomavirus BK-associated nephropathy. *Am J*  
372 *Transplant* (2011) **11**:2443–2452. doi:10.1111/j.1600-6143.2011.03693.x
- 373 5. Comoli P, Azzi A, Maccario R, Basso S, Botti G, Basile G, Fontana I, Labirio M, Cometa A, Poli F, et  
374 al. Polyomavirus BK-specific immunity after kidney transplantation. *Transplantation* (2004) **78**:1229–  
375 1232.
- 376 6. Weist BJD, Wehler P, El Ahmad L, Schmueck-Henneresse M, Millward JM, Nienen M, Neumann AU,  
377 Reinke P, Babel N. A revised strategy for monitoring BKV-specific cellular immunity in kidney  
378 transplant patients. *Kidney Int* (2015) **88**:1293–1303. doi:10.1038/ki.2015.215
- 379 7. Theodoropoulos N, Wang E, Penugonda S, Ladner DP, Stosor V, Leventhal J, Friedewald J, Angarone  
380 MP, Ison MG. BK virus replication and nephropathy after alemtuzumab-induced kidney transplantation:  
381 alemtuzumab induction and BKV nephropathy. *American Journal of Transplantation* (2013) **13**:197–  
382 206. doi:10.1111/j.1600-6143.2012.04314.x
- 383 8. Ginevri F, Azzi A, Hirsch HH, Basso S, Fontana I, Cioni M, Bodaghi S, Salotti V, Rinieri A, Botti G, et  
384 al. Prospective monitoring of polyomavirus BK replication and impact of pre-emptive intervention in  
385 pediatric kidney recipients. *Am J Transplant* (2007) **7**:2727–2735. doi:10.1111/j.1600-  
386 6143.2007.01984.x
- 387 9. Gascoigne NRJ, Rybakin V, Acuto O, Brzostek J. TCR signal strength and T cell development. *Annual*  
388 *Review of Cell and Developmental Biology* (2016) **32**:327–348. doi:10.1146/annurev-cellbio-111315-  
389 125324
- 390 10. Britanova OV, Putintseva EV, Shugay M, Merzlyak EM, Turchaninova MA, Staroverov DB, Bolotin  
391 DA, Lukyanov S, Bogdanova EA, Mamedov IZ, et al. Age-related decrease in TCR repertoire diversity

- 392 measured with deep and normalized sequence profiling. *J Immunol* (2014) **192**:2689–2698.  
393 doi:10.4049/jimmunol.1302064
- 394 11. Qi Q, Liu Y, Cheng Y, Glanville J, Zhang D, Lee J-Y, Olshen RA, Weyand CM, Boyd SD, Goronzy JJ.  
395 Diversity and clonal selection in the human T-cell repertoire. *Proc Natl Acad Sci USA* (2014)  
396 **111**:13139–13144. doi:10.1073/pnas.1409155111
- 397 12. Alanio C, Lemaitre F, Law HKW, Hasan M, Albert ML. Enumeration of human antigen-specific naive  
398 CD8+ T cells reveals conserved precursor frequencies. *Blood* (2010) **115**:3718–3725.  
399 doi:10.1182/blood-2009-10-251124
- 400 13. Meyer EH, Hsu AR, Liliental J, Löhr A, Florek M, Zehnder JL, Strober S, Lavori P, Miklos DB,  
401 Johnson DS, et al. A distinct evolution of the T-cell repertoire categorizes treatment refractory  
402 gastrointestinal acute graft-versus-host disease. *Blood* (2013) **121**:4955–4962. doi:10.1182/blood-2013-  
403 03-489757
- 404 14. Morris H, DeWolf S, Robins H, Sprangers B, LoCascio SA, Shonts BA, Kawai T, Wong W, Yang S,  
405 Zuber J, et al. Tracking donor-reactive T cells: Evidence for clonal deletion in tolerant kidney transplant  
406 patients. *Science Translational Medicine* (2015) **7**:272ra10-272ra10. doi:10.1126/scitranslmed.3010760
- 407 15. Robinson MW, Hughes J, Wilkie GS, Swann R, Barclay ST, Mills PR, Patel AH, Thomson EC,  
408 McLauchlan J. Tracking TCR $\beta$  sequence clonotype expansions during antiviral therapy using high-  
409 throughput sequencing of the hypervariable region. *Front Immunol* (2016)131.  
410 doi:10.3389/fimmu.2016.00131
- 411 16. Babel N, Fendt J, Karaivanov S, Bold G, Arnold S, Sefrin A, Lieske E, Hoffzimmer M, Dziubianau M,  
412 Bethke N, et al. Sustained BK viremia as an early marker for the development of BKV-associated  
413 nephropathy: analysis of 4128 urine and serum samples. *Transplantation* (2009) **88**:89–95.  
414 doi:10.1097/TP.0b013e3181aa8f62
- 415 17. Trydzenskaya H, Sattler A, Müller K, Schachtner T, Dang-Heine C, Friedrich P, Nickel P, Hoerstrup J,  
416 Schindler R, Thiel A, et al. Novel approach for improved assessment of phenotypic and functional  
417 characteristics of BKV-specific T-cell immunity. *Transplantation* (2011) **92**:1269–1277.  
418 doi:10.1097/TP.0b013e318234e0e5
- 419 18. Dziubianau M, Hecht J, Kuchenbecker L, Sattler A, Stervbo U, Rödelsperger C, Nickel P, Neumann AU,  
420 Robinson PN, Mundlos S, et al. TCR repertoire analysis by next generation sequencing allows complex  
421 differential diagnosis of T cell-related pathology. *Am J Transplant* (2013) **13**:2842–2854.  
422 doi:10.1111/ajt.12431
- 423 19. Kuchenbecker L, Nienen M, Hecht J, Neumann AU, Babel N, Reinert K, Robinson PN. IMSEQ--a fast  
424 and error aware approach to immunogenetic sequence analysis. *Bioinformatics* (2015) **31**:2963–2971.  
425 doi:10.1093/bioinformatics/btv309
- 426 20. Oksanen J, Blanchet FG, Friendly M, Kindt R, Legendre P, McGlinn D, Minchin PR, O'Hara RB,  
427 Simpson GL, Solymos P, et al. *vegan: Community Ecology Package*. (2017). Available at:  
428 <https://CRAN.R-project.org/package=vegan>
- 429 21. Shannon CE, Weaver W. *The mathematical theory of communication*. University of Illinois Press  
430 (1949).
- 431 22. Berger WH, Parker FL. Diversity of planktonic foraminifera in deep-sea sediments. *Science* (1970)  
432 **168**:1345–1347. doi:10.1126/science.168.3937.1345

- 433 23. R Core Team. *R: A Language and Environment for Statistical Computing*. Vienna, Austria (2016).  
434 Available at: <http://www.R-project.org/>
- 435 24. Li B, Li T, Pignon J-C, Wang B, Wang J, Shukla SA, Dou R, Chen Q, Hodi FS, Choueiri TK, et al.  
436 Landscape of tumor-infiltrating T cell repertoire of human cancers. *Nat Genet* (2016) **48**:725–732.  
437 doi:10.1038/ng.3581
- 438 25. Schrama D, Ritter C, Becker JC. T cell receptor repertoire usage in cancer as a surrogate marker for  
439 immune responses. *Semin Immunopathol* (2017) **39**:255–268. doi:10.1007/s00281-016-0614-9
- 440 26. Costa AI, Koning D, Ladell K, McLaren JE, Grady BPX, Schellens IMM, van Ham P, Nijhuis M,  
441 Borghans JAM, Keşmir C, et al. Complex T-cell receptor repertoire dynamics underlie the CD8+ T-cell  
442 response to HIV-1. *Journal of Virology* (2015) **89**:110–119. doi:10.1128/JVI.01765-14
- 443 27. Nikolich-Zugich J, Slifka MK, Messaoudi I. The many important facets of T-cell repertoire diversity.  
444 *Nature Reviews Immunology* (2004) **4**:123–132. doi:10.1038/nri1292
- 445 28. Magurran AE. *Ecological Diversity and Its Measurement*. Dordrecht: Springer (1988).
- 446 29. Schachtner T, Stein M, Babel N, Reinke P. The loss of BKV-specific immunity from pretransplantation  
447 to posttransplantation identifies kidney transplant recipients at increased risk of BKV replication:  
448 immune monitoring in BK viremia. *American Journal of Transplantation* (2015) **15**:2159–2169.  
449 doi:10.1111/ajt.13252
- 450 30. Chakera A, Bennett S, Lawrence S, Morteau O, Mason PD, O’Callaghan CA, Cornall RJ. Antigen-  
451 specific T cell responses to BK polyomavirus antigens identify functional anti-viral immunity and may  
452 help to guide immunosuppression following renal transplantation: T cell responses to BKV antigens.  
453 *Clinical & Experimental Immunology* (2011) **165**:401–409. doi:10.1111/j.1365-2249.2011.04429.x
- 454 31. Betts MR, Nason MC, West SM, De Rosa SC, Migueles SA, Abraham J, Lederman MM, Benito JM,  
455 Goepfert PA, Connors M, et al. HIV nonprogressors preferentially maintain highly functional HIV-  
456 specific CD8+ T cells. *Blood* (2006) **107**:4781–4789. doi:10.1182/blood-2005-12-4818
- 457 32. Ciuffreda D, Comte D, Cavassini M, Giostra E, Bühler L, Perruchoud M, Heim MH, Battegay M, Genné  
458 D, Mulhaupt B, et al. Polyfunctional HCV-specific T-cell responses are associated with effective control  
459 of HCV replication. *Eur J Immunol* (2008) **38**:2665–2677. doi:10.1002/eji.200838336
- 460 33. Snyder LD, Chan C, Kwon D, Yi JS, Martissa JA, Copeland CAF, Osborne RJ, Sparks SD, Palmer SM,  
461 Weinhold KJ. Polyfunctional T-Cell Signatures to Predict Protection from Cytomegalovirus after Lung  
462 Transplantation. *Am J Respir Crit Care Med* (2016) **193**:78–85. doi:10.1164/rccm.201504-0733OC
- 463 34. Lei H, Kuchenbecker L, Streitz M, Sawitzki B, Vogt K, Landwehr-Kenzel S, Millward J, Juelke K,  
464 Babel N, Neumann A, et al. Human CD45RA– Foxp3hi memory-type regulatory T cells show distinct  
465 TCR repertoires with conventional T cells and play an important role in controlling early immune  
466 activation. *American Journal of Transplantation* (2015) **15**:2625–2635. doi:10.1111/ajt.13315
- 467 35. Heather JM, Best K, Oakes T, Gray ER, Roe JK, Thomas N, Friedman N, Noursadeghi M, Chain B.  
468 Dynamic perturbations of the T-cell receptor repertoire in chronic HIV infection and following  
469 antiretroviral therapy. *Front Immunol* (2016) **6**:644. doi:10.3389/fimmu.2015.00644
- 470 36. Rossetti M, Spreafico R, Consolaro A, Leong JY, Chua C, Massa M, Saidin S, Magni-Manzoni S,  
471 Arkachaisri T, Wallace CA, et al. TCR repertoire sequencing identifies synovial Treg cell clonotypes in  
472 the bloodstream during active inflammation in human arthritis. *Ann Rheum Dis* (2017) **76**:435–441.  
473 doi:10.1136/annrheumdis-2015-208992

- 474 37. Bacher P, Heinrich F, Stervbo U, Nienen M, Vahldieck M, Iwert C, Vogt K, Kollet J, Babel N, Sawitzki  
475 B, et al. Regulatory T cell specificity directs tolerance versus allergy against aeroantigens in humans.  
476 *Cell* (2016) **167**:1067-1078.e16. doi:10.1016/j.cell.2016.09.050
- 477 38. Alachkar H, Mutonga M, Kato T, Kalluri S, Kakuta Y, Uemura M, Imamura R, Nonomura N, Vujjini V,  
478 Alasfar S, et al. Quantitative characterization of T-cell repertoire and biomarkers in kidney transplant  
479 rejection. *BMC Nephrol* (2016) **17**:181. doi:10.1186/s12882-016-0395-3
- 480 39. Cornberg M, Chen AT, Wilkinson LA, Brehm MA, Kim S-K, Calcagno C, Gherzi D, Puzone R, Celada  
481 F, Welsh RM, et al. Narrowed TCR repertoire and viral escape as a consequence of heterologous  
482 immunity. *J Clin Invest* (2006) **116**:1443–1456. doi:10.1172/JCI27804
- 483 40. Gilfillan S, Dierich A, Lemeur M, Benoist C, Mathis D. Mice lacking TdT: Mature animals with an  
484 immature lymphocyte repertoire. *Science* (1993) **261**:1175–1178. doi:10.1126/science.8356452
- 485 41. La Gruta NL, Thomas PG, Webb AI, Dunstone MA, Cukalac T, Doherty PC, Purcell AW, Rossjohn J,  
486 Turner SJ. Epitope-specific TCR repertoire diversity imparts no functional advantage on the CD8+ T cell  
487 response to cognate viral peptides. *Proceedings of the National Academy of Sciences* (2008) **105**:2034–  
488 2039. doi:10.1073/pnas.0711682102
- 489 42. Wynn KK, Crough T, Campbell S, McNeil K, Galbraith A, Moss DJ, Silins SL, Bell S, Khanna R.  
490 Narrowing of T-cell receptor beta variable repertoire during symptomatic herpesvirus infection in  
491 transplant patients. *Immunology and Cell Biology* (2010) **88**:125–135. doi:10.1038/icb.2009.74
- 492 43. Ritter J, Seitz V, Balzer H, Gary R, Lenze D, Moi S, Pasemann S, Seegebarth A, Wurdack M, Hennig S,  
493 et al. Donor CD4 T cell diversity determines virus reactivation in patients after HLA-matched allogeneic  
494 stem cell transplantation: TCR $\beta$  diversity in transplanted T cells. *American Journal of Transplantation*  
495 (2015) **15**:2170–2179. doi:10.1111/ajt.13241
- 496 44. Wang GC, Dash P, McCullers JA, Doherty PC, Thomas PG. T cell receptor  $\alpha\beta$  diversity inversely  
497 correlates with pathogen-specific antibody levels in human cytomegalovirus infection. *Sci Transl Med*  
498 (2012) **4**:128ra42. doi:10.1126/scitranslmed.3003647
- 499 45. Corse E, Gottschalk RA, Allison JP. Strength of TCR-peptide/MHC interactions and in vivo T cell  
500 responses. *The Journal of Immunology* (2011) **186**:5039–5045. doi:10.4049/jimmunol.1003650
- 501 46. Goronzy JJ, Weyand CM. Understanding immunosenescence to improve responses to vaccines. *Nat*  
502 *Immunol* (2013) **14**:428–436. doi:10.1038/ni.2588

503

504

505 **11 Tables**

506 **Table 1: Characteristics of patients with BKV reactivation**

| Patient | Gender | Age at Tx (Years) | Donor age | HLA match | BKV Viremia onset after Tx | Immunosuppressive medication |                                                      |
|---------|--------|-------------------|-----------|-----------|----------------------------|------------------------------|------------------------------------------------------|
|         |        |                   |           |           |                            | Continual* (Avg daily dose)  | Switch** (Avg daily dose)                            |
| 1       | Male   | 28                | 54        | 3/6       | 64 days                    | MMF (1500mg), PRD (4mg)      | TAC (13.5mg) → CsA (220mg)                           |
| 2       | Male   | 66                | --        | 2/6       | 122 days                   | MMF (2000), PRD (4mg)        | TAC (7.7mg) → CsA (260mg)                            |
| 3       | Male   | 52                | --        | 3/6       | 32 days                    | PRD (4mg)                    | MMF (1080mg) → AZA (75mg); TAC (7.7mg) → CsA (246mg) |
| 4       | Male   | 68                | 77        | 4/6       | 94 days                    | MMF (1500mg), PRD (4mg)      | TAC (7.2mg) → CsA (90mg)                             |
| 5       | Male   | 59                | 45        | 0/6       | ~10.24 years               | MMF (1750mg), PRD (4mg)      | TAC (2mg) → CsA (195mg)                              |
| 6       | Male   | 66                | --        | 0/6       | 67 days                    | MMF (720mg), PRD (4mg)       | TAC (7.5mg) → CsA (195mg)                            |
| 7       | Male   | 65                | 39        | 6/6       | ~6 years                   | MMF (1000mg), PRD (4mg)      | TAC (157mg) → CsA (141mg)                            |

507 \*Therapeutics that remained constant throughout the course of BKV reactivation. \*\* Alteration of therapeutic  
 508 regimen upon diagnosis of BKV reactivation. Values in parenthesis indicate the average daily dose.  
 509 Abbreviations: AZA, azathioprine; CsA, Cyclosporine A; MMF, mycophenolate mofetil; PRD, prednisolone;  
 510 TAC, tacrolimus.  
 511

## 512 **12 Figure legends**

513 **Figure 1: Recipient and donor HLA type.** HLA type of the patients and their kidney donors. Black square  
514 indicate presence of the HLA type, white indicate absence.

515 **Figure 2: Difference in BKV viremia clearance time.** A) BKV viremia remission phase for the individual  
516 patients in the cohort. The dotted line indicates the best linear fit from the time point before BKV-reactivation  
517 to highest BKV load and from the highest BKV load to the first time point with BKV viremia below detection  
518 limit.  $R^2$  indicate the goodness of fit for the time of increasing BKV viremia and for the time with decreasing  
519 viremia. B) Time with increasing BKV viremia for each patient arranged by the time to clear the virus. C)  
520 Clearance time calculated from the slope of a straight line from the highest BKV value to the first time point  
521 with BKV viremia below detection limit.

522

523 **Figure 3: Clearance time is not explained by magnitude and phenotypic characteristics of BKV-specific**  
524 **T-cells.** A) Gating strategy applied in the current study. B-C) Pearson correlation of clearance time with BKV-  
525 specific CD4<sup>+</sup> T-cells (B) and BKV-specific CD8<sup>+</sup> T-cells (C). Each point represents a patient in the study and  
526 the dotted line the best linear fit.

527 **Figure 4: Tracking of BKV-specific TCR clonotypes.** BKV-specific TCR clonotypes were obtained from  
528 IFN $\gamma$  producing T-cells after stimulation with BKV overlapping peptide pools. TCR clonotypes from whole  
529 blood CD4<sup>+</sup> and CD8<sup>+</sup> subsets were obtained at different stages of viral clearance. The overlap between the  
530 clonotypes of whole blood samples and clonotypes of the IFN $\gamma$  producing T-cells were identified as BKV-  
531 specific T-cells in circulation. The abundance of these circulating BKV-specific T-cells were subsequently  
532 compared at distinct stages of viral clearance. Black bars indicate the frequency of clonotypes gained from the  
533 earlier to the later time point. Dark grey indicates the frequency of clonotypes found at both time points. Light  
534 grey indicates the frequency of clonotypes that has disappeared from the earlier time point to the later. A)  
535 Relative change in BKV-specific clonotypes from the initiation of viral clearance (before) to the resolution of  
536 BKV infection (after). B) Relative change in BKV-specific clonotypes from T-cells obtained during the  
537 clearance phase (mid) to the resolution of BKV infection (after). The bars indicate the frequency of clonotypes  
538 gained, lost, or sustained as the viral clearance progressed. Gained clonotypes – clonotypes that were present  
539 after viral clearance, but not before; lost clonotypes – clonotypes that were present at the beginning of the  
540 clearance phase but not thereafter; and sustained clonotypes – clonotypes present before and after viral  
541 clearance.

542

543 **Figure 5: Repertoire analysis of BKV-specific T-cells.** BKV-specific T-cells were isolated and subjected to  
544 clonotype analysis. A) Population diversity by the Shannon index (A) and the inverse Berger-Parker index (B).  
545 C) Comparison of total BKV-specific CD4<sup>+</sup> T-cells (left panel) and CD8<sup>+</sup> T-cells (right panel), for patient 3  
546 and the other patients. D) Pearson correlation of clearance time and cellular exhaustion as marked by PD1 and  
547 TIM3 among activated CD4<sup>+</sup> T-cells, see Figure S2-S8 in Supplementary Material for details. Presented is the  
548 ratio of stimulated cells to negative control (DMSO treated). Each point represents a patient in the study and  
549 the dotted line the best linear fit.

550 **Figure 6: Summary of hypothesis.** Low exhaustion and high TCR $\beta$  diversity results in shorter clearance time  
551 (black line), while high exhaustion and low TCR $\beta$  diversity results in shorter clearance time (gray line).





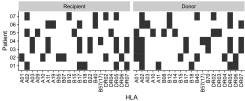

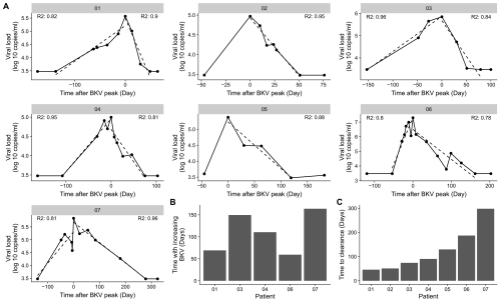

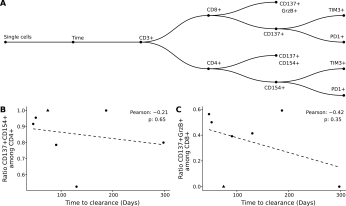

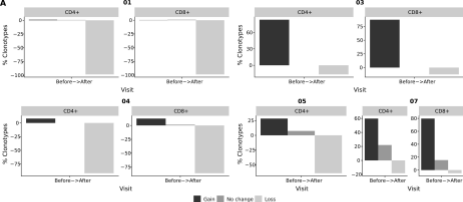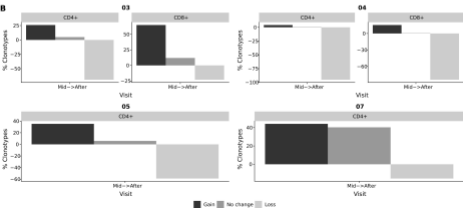

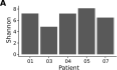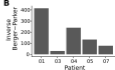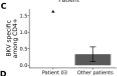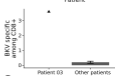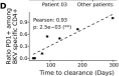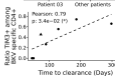

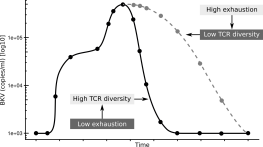

Source: http://biorxiv.org/content/10.1101/556829v1.full.pdf
